# Supplementary material for: Glucocorticoid dysfunction in children with severe malaria
Source: PubMed Central journal article supplement (PMC10364055; doi:10.3389/fimmu.2023.1187196), 2023-07-10
Supplement: DataSheet_1.pdf [file DataSheet_1.pdf]

## Supplementary Material

### 1 Supplementary Figures and Tables

**Supplementary Table 1. List of all qRT-PCR primers**

| Predesigned qPCR assays (IDT) |                                 |                                       |                                                  |
|-------------------------------|---------------------------------|---------------------------------------|--------------------------------------------------|
| Name                          | Ref Seq                         | Exon location                         | Assay ID                                         |
| Human                         |                                 |                                       |                                                  |
| 18S                           | NR_003286(1)                    | Exon 1-1                              | Hs.PT.39a.22214856.g                             |
| TSC22D3<br>(GILZ)             | NM_001015881(3)                 | Exon 4-5                              | Hs.PT.58.4331913                                 |
| FKBP5                         | NM_001145775(4)                 | Exon 7-8                              | Hs.PT.58.20699604                                |
| Mouse                         |                                 |                                       |                                                  |
| TSC22D3<br>(GILZ)             | NM_001077364(1)                 | Exon 2-5                              | Mm.PT.58.42845144                                |
| FKBP5                         | NM_010220(1)                    | Exon 8-9                              | Mm.PT.58.45861921                                |
| Customized primers            |                                 |                                       |                                                  |
| Name                          | Forward primer                  | Reverse primer                        | 6-FAM/ZEN/IBFQ Probe                             |
| GR $\alpha$                   | 5'-<br>AGAACTGGCAGCGG<br>TTT-3' | 5'-<br>GATTGGTGATGATT<br>TCAGCTAAC-3' | 5'-<br>ACTCTTGGATTCTAT<br>GCATGAAGTGGTTG<br>A-3' |

Lymphoid panel

Myeloid panel

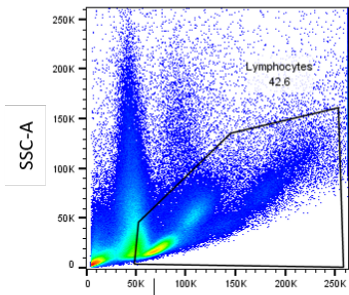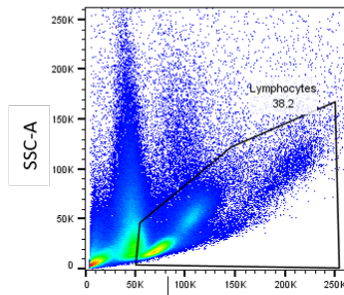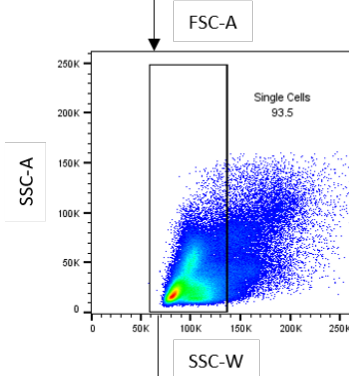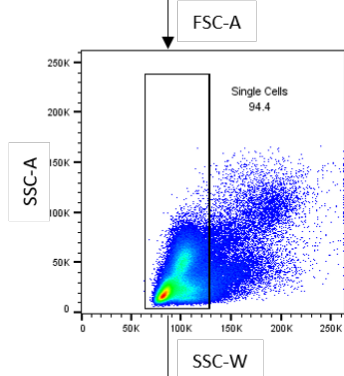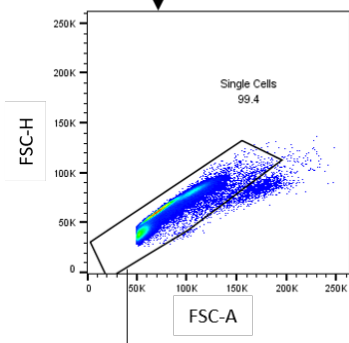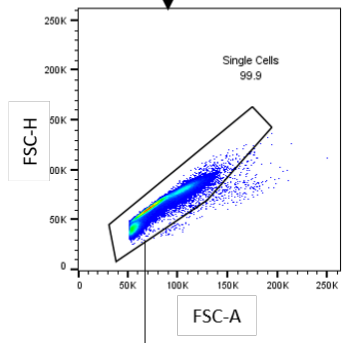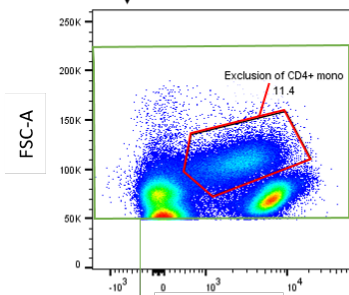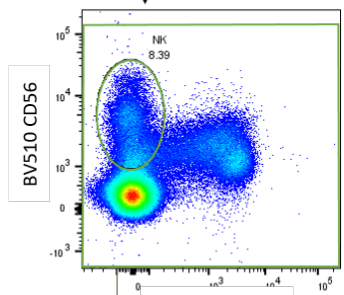

All but CD4+ mono  
T cell gating

All but NK cells  
Monocyte gating

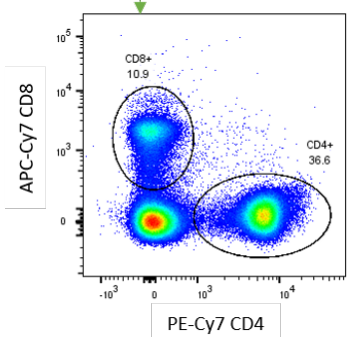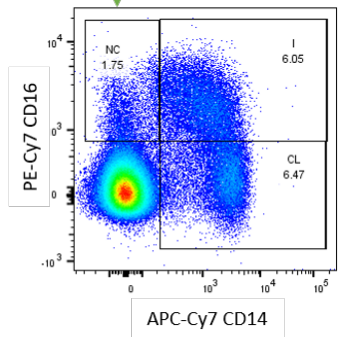

**Supplementary Figure 1. Flow cytometry gating.**

PBMCs were isolated and after 2-NBDG incubation, the cells were stained with a lymphoid and a myeloid panel of antibodies. A representative example of the gating performed with the FlowJo v10 software is shown here with the gating of CD4<sup>+</sup> T cells (CD4<sup>+</sup>), CD8<sup>+</sup> T cells (CD8<sup>+</sup>), NK cells (NK), classical (CL), non-classical (NC) and intermediate (I) monocytes.

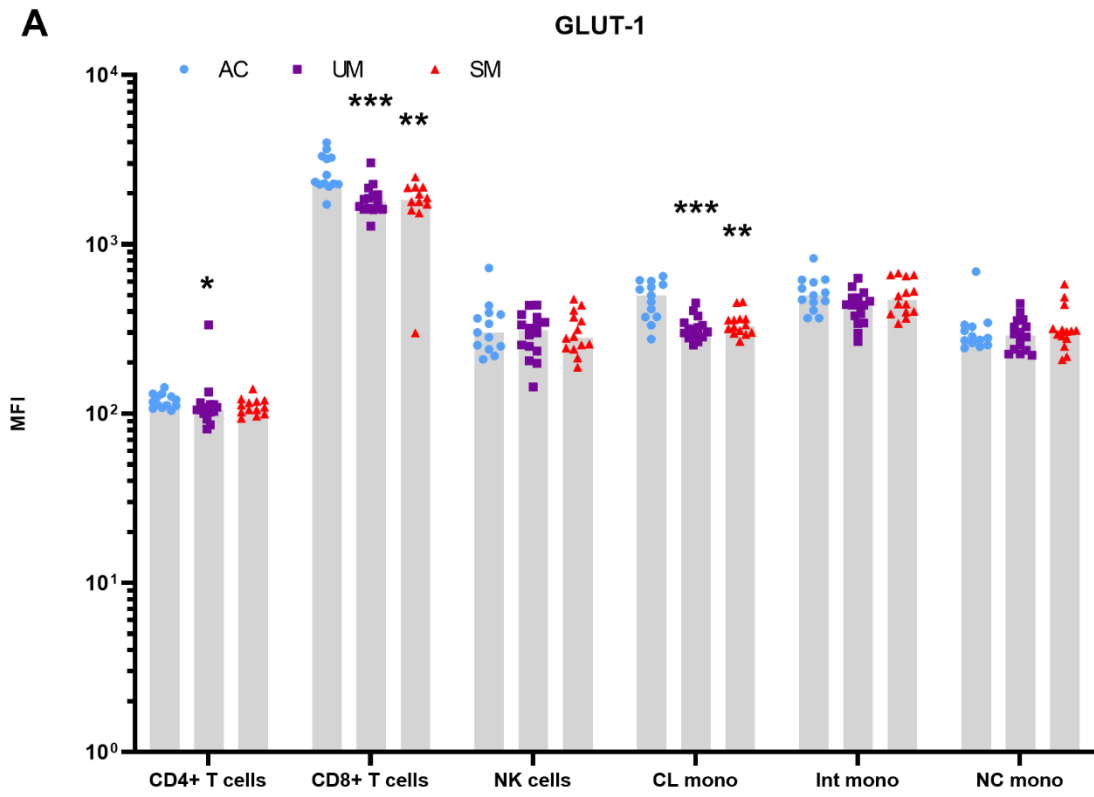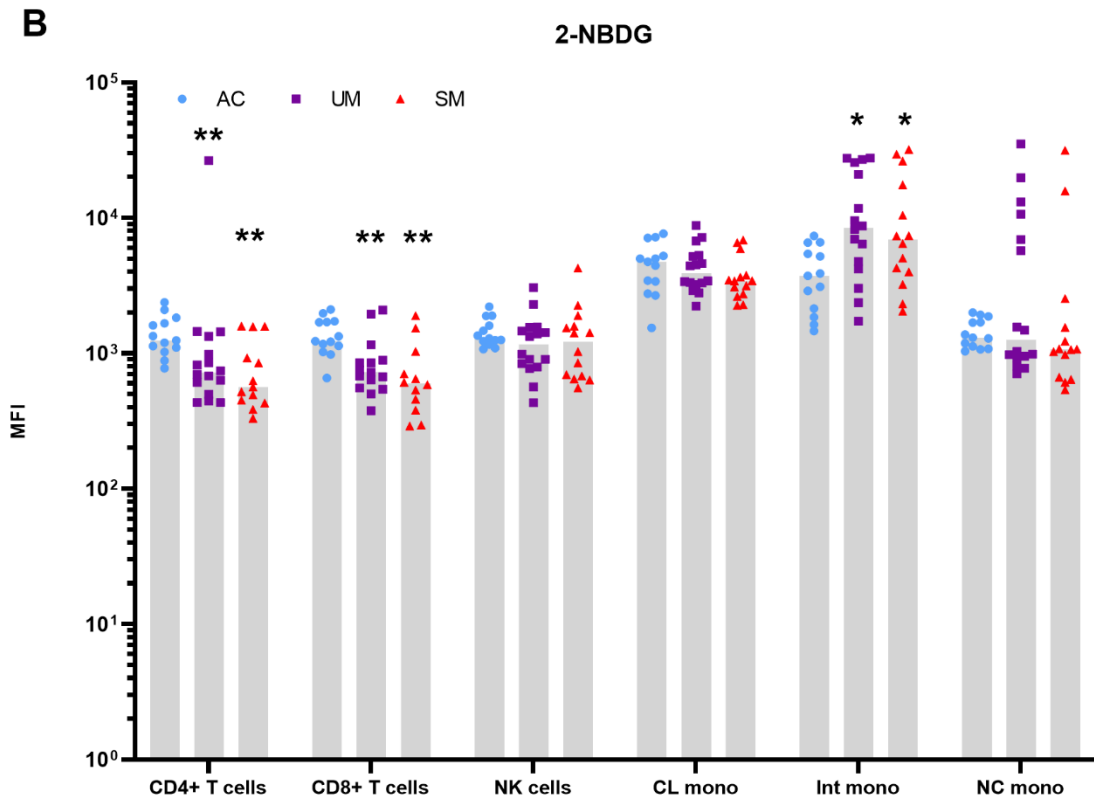

**Supplementary figure 2. Expression of GLUT1 and uptake of 2-NBDG in different cell types.** PBMCs were isolated, 2-NBDG uptake was allowed for 30 min and flow cytometry was performed. **(A)** Median fluorescence intensity (MFI) of GLUT-1 for the indicated subsets. **(B)** MFI of 2-NBDG for the indicated subsets. **(A-B)** Each symbol represents data from an individual. Bars represent group medians and analysis was by Mann-Whitney U-test. Asterisks above individual data sets indicate statistical differences compared to the HC group. \*  $p < 0.05$ , \*\*  $p < 0.01$ , \*\*\*  $p < 0.001$ . NK: Natural Killer; CL mono: classical monocyte; Int mono: Intermediate monocyte; NC mono: Non-classical monocyte. AC n=13; UM n=16; SM n=14. For CD4<sup>+</sup> T cells: UM n=15; SM n=13 and for CD8<sup>+</sup> T cells: UM n=15; SM n=11.

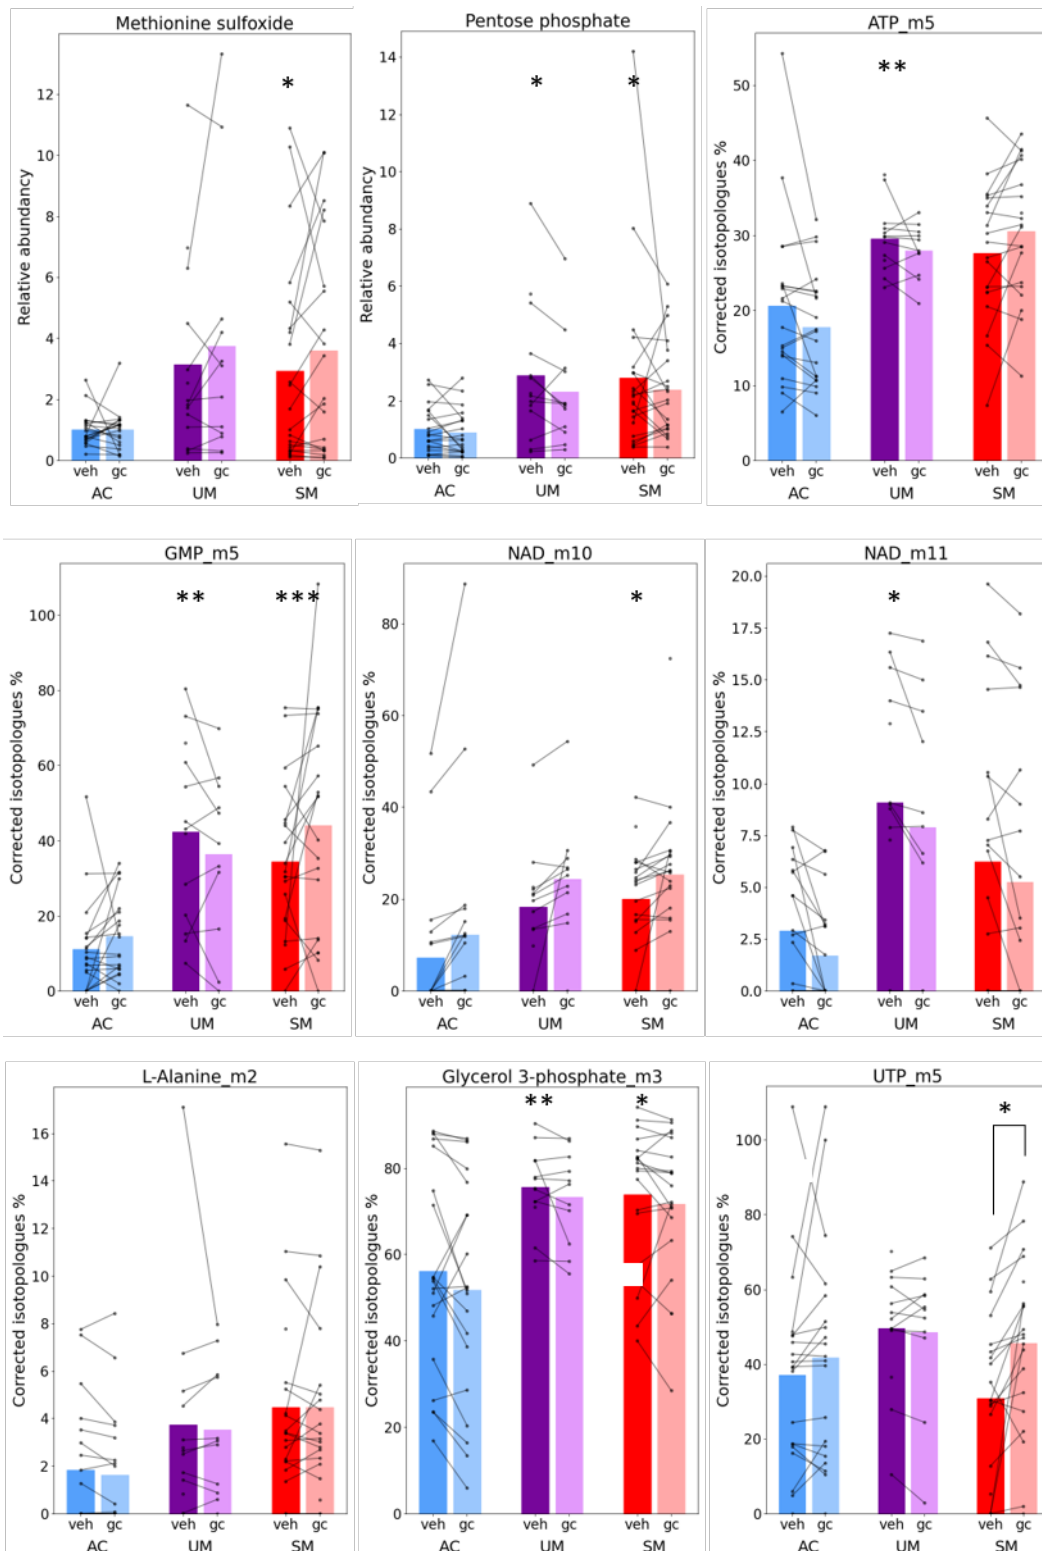

**Supplementary figure 3: Relative abundances and corrected isotopologue percentages of selected metabolites.** PBMCs were isolated and incubated for 24 hours with  $[U-^{13}C]$ -glucose tracer and vehicle (veh) or 150 nM hydrocortisone (gc). Metabolic extracts were analyzed via mass spectrometry. Each symbol represents data from an individual. Bars represent the mean. Analysis by

t-test for comparison between the veh condition of different groups, indicated by asterisks above individual data sets. Analysis by paired t-test for GC-induced effects, indicated by asterisks above lines. Abundancies: AC n=20; UM n=14; SM n=22 veh. Isotopologues: AC n=20; UM n=13; SM n=20.
